1 **Molecular Phenotyping of Oxidative Stress in Diabetes Mellitus with Point-of-care**  
2 **NMR system**

3 Weng Kung Peng<sup>1,2\*</sup>, Lan Chen<sup>2</sup>, Bernhard O Boehm<sup>3,4,5\*</sup>, Jongyoon Han<sup>2,6,7\*</sup>, Tze Ping Loh<sup>8</sup>  
4  
5

6 <sup>1</sup>Department of Nanoelectronics Engineering, International Iberian Nanotechnology Laboratory, Portugal;  
7 <sup>2</sup>BioSystems & Micromechanics IRG (BioSyM), Singapore-MIT Alliance for Research and Technology (SMART)  
8 Centre, Singapore; <sup>3</sup>Lee Kong Chian School of Medicine, Nanyang Technological University, Singapore; <sup>4</sup>Ulm  
9 University Medical Centre, Department of Internal Medicine 1, Ulm University, Ulm, Germany; <sup>5</sup>Imperial College  
10 London, United Kingdom; <sup>6</sup>Department of Electrical Engineering and Computer Science, Massachusetts  
11 Institute of Technology, 36-841, 77 Massachusetts Avenue, Cambridge, MA 02139; <sup>7</sup>Department of Biological  
12 Engineering, Massachusetts Institute of Technology, 36-841, 77 Massachusetts Avenue, Cambridge, MA 02139;  
13 <sup>8</sup>Department of Laboratory Medicine, National University Hospital, 5 Lower Kent Ridge Road, Singapore,  
14 119074.

15  
16  
17 **Abstract:** Diabetes mellitus is one of the fastest growing health burdens globally. Oxidative  
18 stress which has been implicated to the pathogenesis of diabetes complication (e.g.,  
19 cardiovascular event) were, however, poorly understood. We report a novel approach to  
20 rapidly manipulate the redox chemistry (in a single drop) of blood using point-of-care NMR  
21 system. We exploit the fact that oxidative stress changes the subtle molecular motion of  
22 water-proton in the blood, and thus inducing a measurable shift in magnetic resonance  
23 relaxation properties. This technique is label-free and the whole assays finish in a few  
24 minutes. Various redox states of the hemoglobin were mapped out using our newly proposed  
25 two-dimensional map, known as T<sub>1</sub>-T<sub>2</sub> magnetic state diagram. We demonstrated the clinical  
26 utilities of this technique to rapidly sub-stratify diabetes subjects based on their oxidative  
27 status (in conjunction to the traditional glycemic level), to improve the patient risk  
28 stratification and thus the overall outcome of clinical diabetes care and management.  
29 (155 words)

30  
31 **Keywords:** diabetes mellitus, oxidative status, risk stratification, point-of-care NMR  
32 monitoring system

33

---

\*Correspondence and requests for materials should be addressed to W.K. Peng ([weng.kung@inl.int](mailto:weng.kung@inl.int)), B.O.B. ([Bernhard.boehm@ntu.edu.sg](mailto:Bernhard.boehm@ntu.edu.sg)), J. Han ([jyhan@mit.edu](mailto:jyhan@mit.edu))

1 **Key Points for Summaries:**

- 2 1. A novel approach to rapidly manipulate the redox chemistry (in a single drop) of  
3 blood using point-of-care NMR system.  
4 2. Assessment of the oxidative status, in conjunction to their glycemic level allows sub-  
5 stratification of diabetes subjects which was demonstrated clinically.

6  
7 **Visual Abstract:**

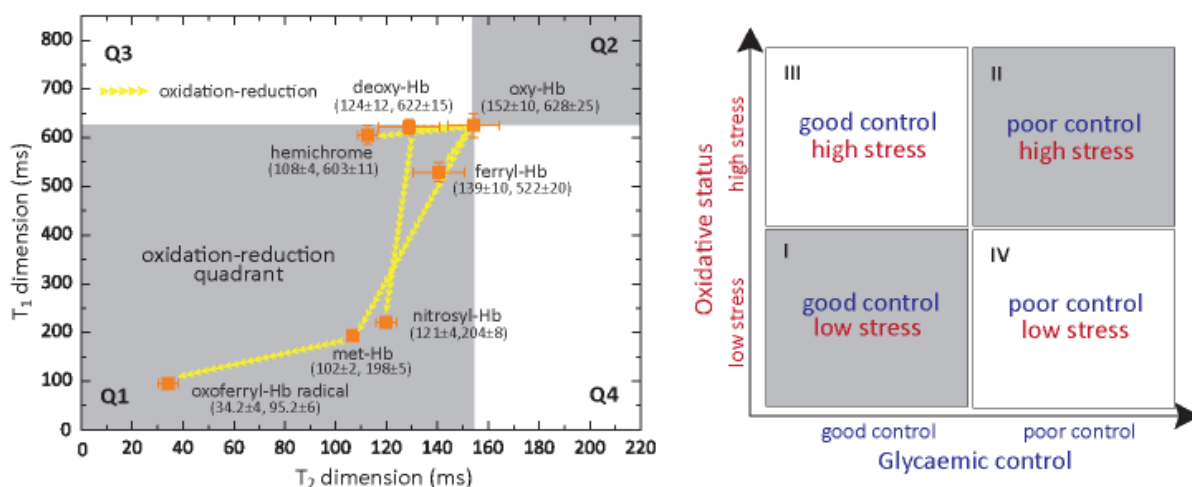

- 8  
9 Word counts = 4482 (in Text) and 155 words (in Abstract)  
10 Figure/table count = 6  
11 Reference count = 55

## 1 INTRODUCTION

2 Diabetes mellitus (DM) is one of the fastest growing health burdens that is projected to affect  
3 592 million people worldwide by 2035<sup>1</sup>. DM is defined by a persistent elevation of plasma  
4 glucose concentration. Under chronic hyperglycemic condition, glucose is non-enzymatically  
5 attached to protein (glycation), which has deleterious effects on their structure and function.  
6 Hence, glycated hemoglobin A<sub>1c</sub> (HbA<sub>1c</sub>), which reflects the overall glycemic burden of an  
7 individual over the previous 2–3 months, is increasingly used to diagnose the disease<sup>2</sup>. It is  
8 also recommended for monitoring long-term glucose control of DM patients, and for risk  
9 stratification<sup>3,4</sup>.

10 However, HbA<sub>1c</sub> does not adequately reflect all the disease associated risk factors. In  
11 particular, restoring HbA<sub>1c</sub> level to near-normal level does not necessarily translate into a  
12 significant reduction of cardiovascular event, a diabetes complication commonly associated  
13 with oxidative stress<sup>5</sup>. In addition, subjects with stable chronic hyperglycemia due to  
14 glucokinase mutations were found to have unexpectedly lower prevalence of  
15 micro/macrovacular complication. A major pathological effect of diabetes mellitus is the  
16 chronic oxidative—nitrosative stress and recently reported carbonyl<sup>6</sup> and methylglyoxal  
17 stress<sup>7</sup>, which drives many of the secondary complications of diabetes including  
18 nephropathy, retinopathy, neuropathy, and cardiovascular diseases<sup>8</sup>. Oxidative-nitrosative  
19 stress can damage nucleic acids, lipids and proteins, which severely compromise the cellular  
20 health and induce a range of cellular responses leading ultimately to cell death<sup>9–11</sup>. Direct  
21 measurement of oxidative stress and susceptibility in patients may improve the prediction  
22 of disease associated risks related to oxidative stress, and hence improve the long term  
23 diabetes care and management program<sup>12,13</sup>.

24 Currently, an individual's oxidative status cannot be easily characterized in detail using  
25 routinely available biomarkers<sup>14</sup> in clinical practice and/or at point of care. This has impeded  
26 the understanding of the pathological effects of acute and prolonged exposure to oxidative  
27 stress. The reactive oxygen species (ROS) and reactive nitrogen species (RNS) are often  
28 reactive and short-lived, may disrupt the redox state of biological tissues/cells (*e.g.*, red  
29 blood cells (RBCs), plasma). Several methods have been developed to detect the redox

1 properties of the blood using the optical<sup>13,15</sup> or magnetic properties<sup>16,17</sup> of the inorganic iron-  
2 chelate of hemoglobin (Hb) and plasma albumin.

3 Electron spin resonance is commonly used to detect the ROS/RNS directly<sup>18,19</sup>. However, the  
4 approach is hampered by inherent sample stability issues and limited sensitivity<sup>20</sup>. Stable  
5 molecular products formed from reactions with ROS/RNS, such as the oxidation targets (*e.g.*,  
6 lipid, protein, nucleic acid) are measurable using a range of spectrophometric assays and  
7 mass spectrometry (MS)<sup>21</sup>. Nevertheless, fluorescent-staining often causes cell-toxicity<sup>21,22</sup>,  
8 and therefore these assays may not provide information that reflects *in vivo* conditions.  
9 Ultraviolet-visible light spectroscopy has poor spectral resolution, and limited sensitivity.  
10 Furthermore, globin-associated free radical in Hb is not optically visible<sup>23</sup> (Supplementary  
11 Figures 1-3). MS-based analysis of ROS/RNS reaction products is a powerful and sensitive  
12 technique to reveal detailed chemistry of these species, yet requires substantial sample  
13 preparation and therefore difficult to be deployed as a rapid screening tool<sup>24</sup>.

14 We herein report an approach to rapidly quantify the composite redox state of the  
15 Hb/plasma by direct measurement of proton relaxation rates of (predominantly) bulk water  
16 using a bench-top sized micro magnetic resonance relaxometry (micro MR) system (Figures  
17 1A-B)<sup>25,26</sup>. The non-destructive nature of the micro MR analysis allows oxidative stress to be  
18 artificially introduced in *ex vivo* environment using different biochemical compounds (*e.g.*,  
19 nitrite, peroxide) in a controlled manner (Figure 1C). This allows functional assessment of  
20 the oxidative susceptibility, tolerance and capacity of a given sample. This yields significantly  
21 richer and clinically useful information about the oxidative stress levels of the blood within  
22 an individual, as compared to routine biomarkers. To enumerate the various redox states of  
23 the Hb (*e.g.*, Fe<sup>2+</sup>, Fe<sup>3+</sup>, Fe<sup>4+</sup>, and globin-associated radical Fe<sup>4+</sup>) and the plasma, two  
24 dimensional relaxations map, known as T<sub>1</sub>-T<sub>2</sub> magnetic state diagram was proposed (Figure  
25 1D). This magnetic state diagram allows visualization and identification of the intermediate  
26 redox states and the transient, dynamic pathways of the blood sample.

27 MR relaxometry is a technique to measure relaxation rate, which can be obtained by  
28 acquiring spin-echoes of (predominantly) water content of the cells/tissues using  
29 conventional nuclear magnetic resonance (NMR) spectroscopy and magnetic resonance

1 imaging (MRI) system. Recent advances in NMR system miniaturization have raised the  
2 prospect of applying these techniques in point-of-care diagnostic setting. These applications  
3 include immuno-magnetic labeling based detection (*e.g.*, tumor cells<sup>27-29</sup>, tuberculosis<sup>30</sup> and  
4 magneto-DNA detection of bacteria<sup>31</sup>) and label-free micro MR detection of various diseases  
5 (*e.g.*, oxygenation<sup>32</sup>/oxidation<sup>26</sup> level of the blood and malaria screening<sup>25,33</sup>).

6 We applied micro MR analysis on whole blood samples to stratify diabetic subjects into  
7 subgroups based on their oxidative status levels in association with their glycemic control  
8 (Figure 1F). Assessment of oxidative status by measuring the redox state of whole blood was  
9 shown to be highly time- and patient specific, revealing information that is potentially critical  
10 for clinical diagnostic, monitoring and prognostic purposes.

11

## 12 RESULTS

13 **T<sub>1</sub>-T<sub>2</sub> Magnetic State Diagram:** Redox homeostasis is a fundamental biological process,  
14 which maintains the balance between ambient anti-oxidant and pro-oxidant activities. The  
15 red blood cell is an important biological agent in ameliorating oxidative stress<sup>34,35</sup>. On the  
16 other hand, free heme is one of the major source of redox-active iron, which causes  
17 downstream deleterious effect on DNA/protein and RBCs themselves. The fundamental  
18 process of oxidative (and nitrosative) stress involve the process of electron transfer, which  
19 lead to the eventual formation of oxidized products. The oxidized product is much more  
20 stable and measurable using proton NMR relaxometry.

21 Here, we chemically induced (Figure 1C and Methods Online) and characterized various  
22 redox states of the red blood cell and represented them using T<sub>1</sub>-T<sub>2</sub> magnetic resonance  
23 relaxation state diagram (Figure 1D). Each Hb species has specific oxidation states (*e.g.*, Fe<sup>2+</sup>,  
24 Fe<sup>3+</sup>, Fe<sup>4+</sup>, globin-associated radical of Fe<sup>4+</sup> or its' corresponding complexes) that are bound  
25 to specific neighboring proteins, and dissipate energy via unique relaxations mechanism in  
26 both the longitudinal (T<sub>1</sub>) and transverse (T<sub>2</sub>) relaxation frames. The T<sub>2</sub> and T<sub>1</sub> relaxation  
27 times measurement were performed using the standard Carr-Purcell-Meiboom-Gill (CPMG)  
28 pulse sequence<sup>36</sup> and inversion-recovery observed by CPMG, respectively. The pairing of

1 both relaxation times forms a specific  $T_1$ – $T_2$  relaxometry coordinate, which is unique to each  
2 redox state.

3 These relaxation times reflect predominantly the bulk water, which came into contact with  
4 macromolecular proton (*e.g.*, hemoglobin, albumin)<sup>37</sup>. Water is an attractive natural  
5 molecular network probing system as it forms hydrogen bonds with practically all others  
6 macromolecule (*e.g.*, protein, metabolite) that are present in human circulation<sup>37,38</sup>.  
7 Therefore, a subtle change of the molecular environment can induce a measurable change in  
8 the proton relaxation rate. Among the early works on relaxation rate dependent on the blood  
9 oxygenation level were carried out by Thulborn et. al.,<sup>39</sup> Gomori et. al.,<sup>40</sup> and eventually used  
10 to measure brain activity known as functional MRI<sup>41</sup>.

11 Oxyhemoglobin (oxy-Hb) which has the lowest reduced ferrous ( $Fe^{2+}$ ) state is the  
12 predominant Hb species in circulation. The oxy-Hb can be provisionally assigned to the  
13 center of the state diagram, which has four quadrants (*i.e.*, Q1, Q2, Q3 and Q4). Due to the  
14 semi-solid structure of RBC and oxidation process which reduces the proton relaxation time,  
15 the redox pathways of RBC mapped out predominantly in Q1.

16 Electrons in the *d* sub-orbital of iron hemoglobin can exist in various paired or unpaired  
17 conditions, rendering them into two possible magnetic states, *i.e.*, diamagnetic and  
18 paramagnetic states, respectively. Hb with at least one unpaired electron, *i.e.* deoxygenated  
19 hemoglobin (deoxy-Hb), methemoglobin (met-Hb), nitrosyl hemoglobin (nitrosyl-Hb), and  
20 oxo-ferryl radical exhibit the effect of paramagnetism with much larger bulk magnetic  
21 susceptibility than its' diamagnetic counterparts *i.e.*, oxy-Hb, ferryl-Hb, and hemichrome  
22 (HC) (Figures. 1D-E, Methods Online). The magnetic relaxivity contributed by paramagnetic  
23 ion is highly dependent on its spin state, and is directly proportional to  $S(S+1)$ , where *S* is the  
24 spin quantum number of the total electron spin. Each of the Hb oxidation states has a specific  
25 normalized relaxation constant (A-ratio= $T_1/T_2$ ) which represent a unique identifier (Figure  
26 1E).

27  
28 **Nitrite-induced Ferrous Oxidation.** Freshly collected whole blood samples containing  
29 predominantly the oxygenated Hb were oxidized *in-vitro* into met-Hb in the presence of

1 sodium nitrite (Methods Online). The oxygenation levels generated *in vitro* were  
2 independently verified using spectrophotometry (Supplementary Figure 1A). Redox  
3 titration profile showed a strong dose-dependent curve, where both  $T_1$  and  $T_2$  relaxation  
4 times reduced gradually as progressively higher proportion of RBCs were oxidized and  
5 increased the volume paramagnetic susceptibility, when the nitrite concentrations were  
6 increased from 50 nM to 10 mM (Figures 2A-B). As the blood sample transformed to a  
7 complete paramagnetic state ( $T_2=92.8$  ms,  $T_1=190.0$  ms) from the initial diamagnetic states  
8 ( $T_2=149.0$  ms,  $T_1=620.0$  ms), the A-ratio dropped from 4.16 to 2.02 ( $R^2>0.95$ , Figure 2C). As  
9 the volume paramagnetic susceptibility increased, this causes the  $T_1$ - $T_2$  trajectory to move  
10 downward in Q1 (Figure 2D).

11 The dose-dependent reaction was lost when excess of nitrite ( $>10$  mM) was introduced. This  
12 suggests that the oxidant concentration had exceeded anti-oxidant capacity and all the  
13 possible oxidation states were saturated. At much lower concentration ( $<100$   $\mu$ M), there was  
14 little or no change in the bulk magnetic state of the RBCs, as the majority of the RBCs were  
15 able to restore to their original reduced state. Interestingly, steep transitional oxidation zone  
16 was observed within a very narrow range of nitrite concentration; from 1 mM to 8 mM, which  
17 reflected the redox homeostatic responses within the concentration where the cells were  
18 viable. This was crucial to the understanding of the functioning of RBCs at cellular and  
19 subpopulation levels (Figures 2A—C).

20 Further evidence of redox homeostasis was observed in time-dependent kinetic profiles  
21 (Figures 2E—F) over a range of nitrite concentrations (500  $\mu$ M, 4 mM, 8 mM and 10 mM). In  
22 general, the measured  $T_1$  and  $T_2$  readings changed in an oscillatory manner over time. This  
23 may suggest an active mechanism to regulate cell redox homeostasis. As the RBCs aged,  
24 antioxidant capacity is reduced, thereby forming a subpopulation of cell with  
25 disproportionately low antioxidant capacity<sup>1</sup>.

26 The amplitudes of the oscillation decreased as the nitrite concentration was increased from  
27 500  $\mu$ M to 4 mM (Figure 2H). At much higher nitrite concentration ( $>10$  mM), the reaction  
28 curve decayed rapidly in an exponential manner with an increasingly dampened oscillation.  
29 Similar observations were recorded using spectrophotometry (Supplementary Figure 1).

1 Interestingly, the corresponding kinetic profiles followed an identical path over time in the  
2  $T_1$ - $T_2$  trajectories as the nitrite concentration was increased (Figure 2G). The oxidation  
3 process drove all the trajectories toward a common coordinate ( $T_2= 92.8$  ms,  $T_1= 190.0$  ms),  
4 where all the RBCs were converted fully into met-Hb. For low nitrite concentration (*e.g.*, 500  
5  $\mu$ M) however, the  $T_1$ - $T_2$  trajectory circulated around the origin and did not reach the  
6 eventual met-Hb coordinates.

### 7 **Functional Phenotyping of Oxidative and Nitrosative Stress in Subjects with Diabetes**

8 **Mellitus.** A cross sectional study was carried out to stratify DM subjects based on their  
9 oxidative status. DM subjects ( $n=185$ ) who had HbA<sub>1c</sub> measured in the outpatient clinic as  
10 part of their clinical care (random blood sample) were included in this study. These subjects  
11 had HbA<sub>1c</sub> ranging from 4% to 16% and the subjects were classified into good glycaemic  
12 control ( $<7.0\%$  HbA<sub>1c</sub>) and poor glycaemic control ( $>8.0\%$  HbA<sub>1c</sub>) subgroups<sup>2</sup>. Healthy young  
13 male subjects ( $n=32$ ; age range of 21 to 40 years, fasting glucose below 5.6 mmol/L, average  
14 HbA<sub>1c</sub> of 5.16 ( $\pm 0.32$ ) %, and body mass index below 23.5 kg/m<sup>2</sup>) were separately recruited  
15 as control subjects. The collected whole blood in EDTA-anticoagulated tubes were  
16 centrifuged (14 000 *g*, 5 min) to separate the RBCs and plasma. The micro MR analysis was  
17 performed blindly on freshly collected fasting blood samples or otherwise kept at 4°C within  
18 2 hours. Other clinical laboratory tests (*e.g.*, HbA<sub>1c</sub>) were performed in parallel.

19 **Baseline study: Oxidative Status of Glycated Hb in RBCs.** The baseline reading of intact  
20 RBCs were measured and mapped using in  $T_1$ - $T_2$  magnetic state diagram. It appears that  
21 subjects with poor glycaemic control (red) have much shorter  $T_1$  and  $T_2$  readings as  
22 compared healthy control subjects (blue) (Figures 3A-B). This was mainly due to the  
23 presence of higher concentration of ferric Hb *i.e.*, the low spin (HC) and high spin (met-Hb),  
24 which contribute to reduction in  $T_1$  and  $T_2$  relaxation times (Figure 2 and Supplementary  
25 Figure 4). The formation of HC and its relaxation response were further verified using *in-*  
26 *vitro* chemical stress (Supplementary Figure 4). In particularly, ferric Hb concentration were  
27 markedly elevated in DM subjects with poor glycaemic control ( $>10\%$  HbA<sub>1c</sub>) (Figures 3B—  
28 D). Although DM subjects with good glycaemic control had only slightly elevated  $T_1$  and  $T_2$   
29 readings, as compared with healthy control subjects (Figure 3b), the use of A-ratio plot  
30 yielded significantly better resolution ( $P<0.01$ ) (Figure 3E).



1 **Ex vivo Nitrosative Functional Stress Test on Glycated-Hb.** To further evaluate the ability  
2 of RBCs to tolerate the nitrosative stress, we artificially challenged the RBCs with strong  
3 oxidant (nitrite). Freshly collected RBCs were incubated with 6 mM sodium nitrite for 10  
4 min, washed three times to stop the reaction and finally resuspended in 1x PBS for micro MR  
5 analysis (Methods Online). The sodium nitrite concentration chosen was within the viable  
6 homeostatic range (Supplementary Figures 5, 6 and 7). The micro MR analyses were  
7 assessed before (black square) and after (red circle) the stress test.

8 DM subjects with poor (n=39) and good (n=28) glycaemic control with similar matching  
9 RBCs baseline (black squares in Figure 4A-B) were chosen for this test. Lower anti-nitration  
10 capacity (or increased in nitrosative stress susceptibility) was indicated by an increase in  
11 met-Hb formation (red circles) and hence the lower the  $A_{\text{nitrosative-ratio}}$  value. DM subjects  
12 vary markedly in their nitrosative susceptibility despite having similar baseline; with DM  
13 subjects with poor glycaemic control being more susceptible to nitrite-induced oxidation as  
14 compared to its' counterpart with good glycaemic control (Figure 4C). Receiver Operating  
15 Characteristic (ROC) analyses showed that the initial baseline ( $AUC < 0.44$ ) between the  
16 subjects from poor and good glycaemic subgroups had increased ( $AUC > 0.62$ ) upon nitrite  
17 stress (Figure 4D). Due to structural modification of Hb as a result of increased glycation,  
18 HbA<sub>1c</sub> is less stable and more prone to oxidation, in agreement with observation reported  
19 elsewhere<sup>42,43</sup>.

20 The spread of the baseline was large for the good glycaemic control group, which suggests a  
21 large between-subject variability of nitrosative susceptibility, despite having similar  
22 glycaemic level (Figure 4E). Using the nitrosative susceptibility ( $A_{\text{nitrosative-ratio}}$ ), which could  
23 be derived hypothetically from this study and the traditional index of glycaemic control  
24 (HbA<sub>1c</sub>), DM subjects could be stratified into four distinct quadrants (*i.e.*, Q1 to Q4). This  
25 approach singled out a minority group in Q3 (subgroup III), who had good glycaemic control,  
26 and yet had (high) nitrosative stress  $A_{\text{nitrosative-ratio}}$  that was at 75<sup>th</sup> percentile that of typical  
27 DM subjects with poor glycaemic control and at 95<sup>th</sup> percentile of the healthy control  
28 subjects.

29

1 **Baseline Study: Glycation and Glycooxidation of Plasma.** Increased blood glucose  
2 promotes non-enzymatic glycation of plasma proteins, which include the albumin, alpha-  
3 crystalline, collagen, and low-density lipoprotein. A large proportion of total serum protein  
4 is attributable to serum albumin<sup>44,45</sup>. Glycation and oxidative damage cause protein  
5 modification, which affects the protein functionality<sup>46</sup>. The micro MR analyses were  
6 performed at room temperature (26°C). Each T<sub>1</sub>-T<sub>2</sub> coordinate represents the composite  
7 redox properties of one subject's plasma (Figure 5A). The baseline readings of the DM  
8 subjects have much shorter T<sub>1</sub> and T<sub>2</sub> relaxation times, and it was well separated from the  
9 healthy non DM subjects (blue). Notably, DM subjects with poor glycemic control, in  
10 particularly DM subjects of >10% HbA<sub>1c</sub> subgroup (mean A-ratio of 2.52), seen a strong  
11 departure from the healthy controls (mean A-ratio of 2.13) (Figure 5B).

12 The marked reduction in relaxation states was attributed to an increase in glycation and  
13 glycooxidation of the serum albumin, known as glucose toxicity. As a result of increased  
14 glycation (*in-vitro* validation in Supplementary Figure 8a) and protein oxidative damage<sup>46</sup>  
15 (*e.g.*, protein cross-linking), the bulk water proton of mobility was further restricted,<sup>47</sup>  
16 leading to reduction in T<sub>1</sub> and T<sub>2</sub> relaxation times. T<sub>2</sub> relaxation however reduced much  
17 faster than T<sub>1</sub> relaxation resulting in an increase in A<sub>baseline</sub>-ratio, which correlated positively  
18 with HbA<sub>1c</sub> (R<sup>2</sup>>0.2) (results not shown). Similar trends were observed *in vitro*, which  
19 confirm the effects of glycation (Supplementary Figures 8A-B) and glycooxidation  
20 (Supplementary Figure 8C). A separate study by Cistola *et. al.*, recently found that the  
21 baseline T<sub>2</sub> of water plasma/serum shown a strong correlation in subjects with metabolic  
22 abnormalities<sup>38,48</sup>. Interestingly, ROC analysis indicates DM subjects with good-glycemic  
23 control and healthy controls subjects had AUC of 0.91, much higher than the one observed in  
24 RBCs (AUC<0.67) (Figure 5C). The result seems to suggest that pathological footprint of  
25 hyperglycemia is more prominent in extracellular plasma as compared to the RBCs at  
26 baseline level.

27

28 **Peroxide induced Oxidation Analysis: Total Anti-oxidant Capacity of Plasma in**  
29 **Diabetes Mellitus Subjects.** In order to evaluate the total anti-oxidant capacity of plasma  
30 towards oxidation, we artificially challenged the plasma with hydrogen peroxide in subjects

1 with poor glycaemic control (n=52), good glycaemic control (n=18), and healthy control  
2 (n=21) (Figure 6). Hydrogen peroxide solution was added into the freshly drawn plasma  
3 (10% v/v) for an incubation time of 10 min (Methods Online and Supplementary Figure 9).  
4 The micro MR analyses were performed before (black squares) and after (red circles) the  
5 mixing (Figures 6A—C).

6 The results of this stress test revealed a large spread of  $T_1$ - $T_2$  coordinates for DM subjects  
7 (Figures 6A—B), indicating marked variation in their peroxidative susceptibility as  
8 compared to healthy controls (Figure 6C). Lower anti-oxidant capacity (or increase in  
9 peroxidative stress susceptibility) of plasma is indicated by reduction in  $T_1$  and  $T_2$  relaxation  
10 coordinates (red circles). As more oxidized plasma was formed, the  $T_1$  relaxation time  
11 reduced much faster than  $T_2$  relaxation time, and hence the reduction in  $A_{\text{peroxidative-ratio}}$   
12 (Figure 6D), which was in agreement with *in vitro* validation (Supplementary Figure 8c).

13 DM subjects had much higher plasma peroxidative susceptibility as compared to non-DM  
14 counterparts (Figure 6E). The normalized plasma peroxidative stress susceptibility can be  
15 defined by the difference between the  $A_{\text{baseline-ratio}}$  and the  $A_{\text{peroxidative-ratio}}$  (Figure 6e). Note  
16 that the plasma baseline (black) measurements of this cohort having similar positive  
17 correlation with glycaemic levels (Figure 6D) were in agreement with the previous cohort  
18 measured independently<sup>49</sup> (Figure 5). Exposure to peroxy compound leads to an increased  
19 formation of disulfide bonds in albumin and human non-mercaptalbumin, which was also  
20 observed in several others pathological state<sup>50,51</sup>. The proposed peroxidative susceptibility  
21 measurement that is independent of  $HbA_{1c}$  can be used to stratify the DM subjects into  
22 subgroups, which provide insight into the oxidative status (susceptibility and damage) in  
23 personalized manner (Figure 6E).

## 1 **DISCUSSION**

2 We have developed a highly sensitive approach to accurately detect and quantify the redox  
3 (and hence oxidative/nitrosative) state and the subtle molecular motion changes of blood  
4 samples, inferred based on the relaxation measurement. This is the first demonstration of  
5 the unique magnetic resonance relaxation properties of the various hemoglobin states,  
6 which were mapped out using the proposed magnetic state diagram. The measurement of  
7 redox properties in plasma/erythrocytes can provide a useful parameter for functional  
8 phenotyping of many biological pathways to better understand disease pathophysiology.  
9 This technology has vast potential to be applied for clinical disease diagnosis, prognosis and  
10 monitoring, given that the specificity of the oxidative stress in association with the disease  
11 state can be further improved in near future.

12 The platform presented here has several innovative features and is readily adaptable for  
13 clinical use (Supplementary Figure 10). Firstly, the miniaturized platform<sup>26,52</sup> developed  
14 here is portable and the proposed assays requires minimal processing steps, low-cost, robust  
15 and can therefore be performed by minimally trained operator. The high sensitivity can be  
16 attributed to the micron-sized detection coil and optimized ultra-short echo time  
17 implemented in this work. Only a minute amount of blood sample volume (< 10  $\mu$ L) is needed  
18 for each test, which enables the collection of sample using minimally invasive technique<sup>26,53</sup>  
19 such as finger prick a standard procedure in patient care.

20 Secondly, we exploited the non-destructive nature of magnetic resonance, and introduced a  
21 number of *in-vitro* functional assays that yielded parameters about the oxidative status of an  
22 individual, which may be clinically useful. It probes the primary redox event as compared to  
23 the current gold-standard biomarker, isoprostanes, which is a downstream marker and may  
24 be susceptible to confounding factors. The use of isoprostanes as biomarker of oxidative  
25 status for correlation with disease outcome has so far yielded conflicting results in cross-  
26 sectional versus longitudinal studies<sup>54,55</sup>. Furthermore, they are static biomarkers that  
27 provide snapshots of the oxidative status of biological samples representing the *in vivo*  
28 condition of the subject at the point of collection. To accurately measure these molecules,

1 laborious technique such as gas- or liquid-chromatography mass spectrometry has to be  
2 employed, limiting its' utility as diagnostic tools.

3 Further clinical validation is needed to compare current proposed biomarkers with  
4 isoprostanes, and a combined assessment may yield even richer information. A long-term  
5 follow-up and large-scale prospective study is currently underway to evaluate the diagnostic  
6 performance of this technique. This accurate and rapid technique for quantification of  
7 oxidative stress may be included in future risk stratification models where subjects with  
8 single or multiple complications can be streamlined based on their oxidative index. This  
9 work opens up new opportunities for molecular phenotyping of oxidative stress in a rapidly  
10 and systematic manner for various chronic diseases (*e.g.*, cancer) and a range of hematology  
11 applications (*e.g.*, sepsis), including the acquired and congenital diseases such as enzymatic  
12 deficiency, Hb synthesis defects (*e.g.*, Thalassemia), and Hb molecular defects (*e.g.*, sickle  
13 cells anemia, unstable Hb).

14

## 15 **ACKNOWLEDGEMENT**

16 This research was supported by Start-Up Grant of W.K. Peng at International Iberian  
17 Nanotechnology Laboratory and National Research Foundation Singapore through the  
18 Singapore MIT Alliance for Research and Technology's BioSystems and Micromechanics  
19 Inter-Disciplinary Research programme. BOB is supported by grants from LKC School of  
20 Medicine.

21

## 22 **AUTHOR CONTRIBUTIONS**

23 W.K. Peng and T.P. Loh conceived the original idea and analyzed the results, and wrote the  
24 first draft of the paper together. W.K. Peng designed the experiments/protocols, proposed  
25 the magnetic state diagram, and spearhead the entire hardware development. L. Chen assists  
26 in hardware development and performed most of the micro MR analyses and related assays.

1 B.O.B provided input regarding translational medicine applications. All the authors checked  
2 through the manuscript and analyzed the data.

3

4 **CONFLICT OF INTEREST DISCLOSURES**

5 The authors declare no competing financial interests. One technology disclosure related to  
6 this technology was filed.

7

1  
2  
3  
4  
5  
6  
7  
8  
9  
10  
11  
12  
13  
14  
15  
16  
17  
18  
19  
20  
21  
22  
23  
24  
25  
26  
27  
28

## **METHODS and MATERIALS**

**Magnetic resonance relaxation measurement and detection.** The proton nuclear magnetic resonance (NMR) measurements of predominantly the bulk water of red blood cells (RBCs) and plasma were carried out at the resonance frequency of 21.57 MHz using a bench-top type console (Kea Magritek, New Zealand) and portable permanent magnet (Metrolab Instruments, Switzerland),  $B_0=0.5$  T. A homebuilt temperature controller was constructed to regulate the temperature at 26°C inside the measurement chamber. This helped maintained the stability of the magnetic field and biological sample under measurement. Single resonance proton micro magnetic resonance (MR) probe with detection coil of 1.55 mm inner diameter was constructed to accommodate a heparinized microcapillary tube (outer diameter: 1.50 mm, inner diameter: 0.95 mm) (Fisherbrand, Fisher Scientific, PA) for a detection region of approximately 3.8  $\mu$ L in volume. The longitudinal relaxation times,  $T_1$  were measured by standard Inversion-Recovery pulse sequences observed by Carr-Purcell-Meiboom-Gill (CPMG) train pulses. The transverse relaxation times,  $T_2$  were measured by standard CPMG train pulses (inter echo time: 200  $\mu$ s) consisting of 2000 echoes. A total of 12 scans were typically acquired for signal averaging unless mentioned otherwise. The transmitter power output was maintained at 360 mW for a single 90° pulse of 6  $\mu$ s pulse length, which corresponds to a nutation frequency of 41.6 kHz. The delay between each pulse (recycle delay) were set at 1s and 4s for RBCs and plasma, respectively.

**Ethics and Blood Collection.** This study received approval from the local Institutional Review Board of the National Healthcare Group. Patients were not identified throughout the study. The EDTA-anticoagulated whole blood samples were collected using standard phlebotomy procedures. All blood samples were kept at  $\leq 4^\circ\text{C}$  within two hours of collection and were kept refrigerated until analysis.

1 **Healthy subjects.** Subjects without past history of diabetes mellitus (DM) and had normal  
2 oral glucose tolerance test according to the American Diabetes Association criteria (fasting  
3 glucose <5.6 mmol/L; two hour post oral glucose tolerance test glucose of <7.8 mmol/L)  
4 were recruited into this study following provision of informed consent. They were Chinese  
5 males aged between 21 and 40 years, with a body mass index below 23.5 kg/m<sup>2</sup>.

6  
7 **Subjects with Diabetes Mellitus.** Anonymised residual samples collected from DM  
8 patients at the outpatient clinic for measurement of glycated hemoglobin (HbA<sub>1c</sub>) as part of  
9 their clinical care, were included in this study. The HbA<sub>1c</sub> was measured using the Bio-Rad  
10 Variant II analyzer. This National Glycohemoglobin Standardization Program (NGSP)  
11 certified instrument has an analytical coefficient of variation of <2% at HbA<sub>1c</sub> concentration  
12 of 4% and 16%. Our laboratory is NGSP level 1-certified.

13  
14 **Sample Preparation and micro MR analysis.** Fresh RBCs were washed three times with  
15 1x PBS solution and re-suspended at 10% hematocrit with PBS. The selected chemical was  
16 then mixed into the prepared blood at desired concentration (see **Biochemical Assays**  
17 details below). The final concentrations were recalculated based on the entire volume. Other  
18 lower concentrations were prepared according to appropriate dilution. A horizontal shaker  
19 was used to homogenously mix (at 200 rpm) for all the chemically treated samples at room  
20 temperature. The blood was incubated between a few minutes to a few hours, as indicated  
21 in *Text*. The blood was then washed three times to remove the chemical residual. A  
22 heparinized microcapillary tube is used to transfer 40 µL volume of blood via capillarity  
23 action. In order to obtain packed RBCs for micro MR analysis, the microcapillary tubes were  
24 spun down at 3000 *g* for 1 minute.

25  
26 **Details on Biochemical Assays. Sodium nitrite treated RBCs.** 20 µL of the desired  
27 concentration (in the range 500 µM to 100 mM) of sodium nitrite were then mixed into 180  
28 µL of the prepared blood. Hydrogen peroxide treated RBCs. 20 µL of 3% hydrogen peroxide  
29 stock solution (approximately 0.9 M), which was purchased commercially from Sigma



1 Aldrich, was mixed into 180  $\mu\text{L}$  of the prepared blood. Sodium salicylate treated RBCs. 20  $\mu\text{L}$   
2 of the desired concentration (as described in the *Text*) of sodium salicylic were then mixed  
3 into 180  $\mu\text{L}$  of prepared blood. Preparation of Oxo-ferryl Hb. Oxo-ferryl Hb was prepared in  
4 two steps. The RBCs were first treated with sodium nitrite (similar to the protocol described  
5 above) to convert the RBCs into met-Hb. Hydrogen peroxide were then added into the met-  
6 Hb using the same protocol as described above. Preparation of Nitrosyl-Hb. The nitrosyl Hb  
7 was prepared in two steps. The RBCs were first converted into deoxygenated Hb (similar to  
8 the protocol described below) and treated with sodium nitrite using the same protocol as  
9 described above. Preparation of Deoxygenated Hb. 20  $\mu\text{L}$  of natrium hydrosulfite,  $\text{Na}_2\text{S}_2\text{O}_4$   
10 (10 mM final concentration, Sigma Aldrich) were then mixed into 180  $\mu\text{L}$  of prepared blood  
11 and mix homogenously (at 200 rpm) for 10 minutes with a horizontal shaker. The UV-Visible  
12 spectrum was recorded immediately to confirm the presence of deoxygenated hemoglobin.  
13 Pure gas  $\text{N}_2$  was continuously purged into an airtight chamber in order to maintain the de-  
14 oxygenated condition. The UV-VIS absorbance was used to confirm the presence of  
15 deoxygenated-Hb by its distinct peak at 543 nm. Hydrogen peroxide treated plasma. The  
16 fresh whole blood collected were centrifuged at 14,000  $g$  for 5 minutes to separate the  
17 plasma from the packed RBCs. 10  $\mu\text{L}$  of hydrogen peroxide solution were then mixed into 90  
18  $\mu\text{L}$  of prepared plasma and other lower concentrations were prepared according appropriate  
19 dilutions.

20 **Statistical analysis.** Unless otherwise noted, all statistical analyses were performed using  
21 OriginPro (OriginLab Corporation, United States). For statistical analysis, t-tests were used.  
22 All error bars represent were either in standard deviation (s.d.) or standard error  
23 measurements (s.e.m) of means and the statistical results were stated as *P*-values.

24  
25 **Data Sharing Statement.** The original data that support the findings of this study are  
26 available from the corresponding author ([weng.kung@inl.int](mailto:weng.kung@inl.int)) upon reasonable request.

27

1 **References**

- 2
- 3 1. Abdulbari Bener FM. Projection of Diabetes Burden through 2025 and Contributing Risk Factors of
- 4 Changing Disease Prevalence: An Emerging Public Health Problem. *Journal of Diabetes & Metabolism*.
- 5 2014;05(02).
- 6 2. Use of Glycated Haemoglobin (HbA1c) in the Diagnosis of Diabetes Mellitus: Abbreviated Report of a
- 7 WHO Consultation. Geneva: World Health Organization; 2011.
- 8 3. Duckworth W, Abraira C, Moritz T, et al. Glucose Control and Vascular Complications in Veterans with
- 9 Type 2 Diabetes. *New England Journal of Medicine*. 2009;360(2):129–139.
- 10 4. Saisho Y. Glycemic variability and oxidative stress: a link between diabetes and cardiovascular disease?
- 11 *Int J Mol Sci*. 2014;15(10):18381–18406.
- 12 5. Intensive Blood Glucose Control and Vascular Outcomes in Patients with Type 2 Diabetes. *New England*
- 13 *Journal of Medicine*. 2008;358(24):2560–2572.
- 14 6. Zhao H-L, Lai FMM, Tong PCY, et al. Prevalence and clinicopathological characteristics of islet amyloid
- 15 in chinese patients with type 2 diabetes. *Diabetes*. 2003;52(11):2759–2766.
- 16 7. Boehm BO, Schilling S, Rosinger S, et al. Elevated serum levels of N(epsilon)-carboxymethyl-lysine, an
- 17 advanced glycation end product, are associated with proliferative diabetic retinopathy and macular
- 18 oedema. *Diabetologia*. 2004;47(8):1376–1379.
- 19 8. Rabbani N, Thornalley PJ. Measurement of methylglyoxal by stable isotopic dilution analysis LC-MS/MS
- 20 with corroborative prediction in physiological samples. *Nature Protocols*. 2014;9(8):1969–1979.
- 21 9. Bierhaus A, Humpert PM, Morcos M, et al. Understanding RAGE, the receptor for advanced glycation
- 22 end products. *Journal of Molecular Medicine*. 2005;83(11):876–886.
- 23 10. Soro-Paavonen A, Watson AMD, Li J, et al. Receptor for Advanced Glycation End Products (RAGE)
- 24 Deficiency Attenuates the Development of Atherosclerosis in Diabetes. *Diabetes*. 2008;57(9):2461–
- 25 2469.
- 26 11. Baynes JW. Role of oxidative stress in development of complications in diabetes. *Diabetes*.
- 27 1991;40(4):405–412.
- 28 12. Maritim AC, Sanders RA, Watkins JB. Diabetes, oxidative stress, and antioxidants: A review.
- 29 *Journal of Biochemical and Molecular Toxicology*. 2003;17(1):24–38.
- 30 13. Holley AE, Cheeseman KH. Measuring free radical reactions in vivo. *Br. Med. Bull*. 1993;49(3):494–
- 31 505.
- 32 14. Ihnat MA, Thorpe JE, Ceriello A. Hypothesis: the ‘metabolic memory’, the new challenge of
- 33 diabetes. *Diabetic Medicine*. 2007;24(6):582–586.
- 34 15. Shah SS, Diakite SAS, Traore K, et al. A novel cytofluorometric assay for the detection and
- 35 quantification of glucose-6-phosphate dehydrogenase deficiency. *Sci Rep*. 2012;2:299.
- 36 16. Kopáni M, Celec P, Danisovic L, Michalka P, Biró C. Oxidative stress and electron spin resonance.
- 37 *Clin. Chim. Acta*. 2006;364(1–2):61–66.
- 38 17. Lee M-C-I. Assessment of oxidative stress and antioxidant property using electron spin resonance
- 39 (ESR) spectroscopy. *J Clin Biochem Nutr*. 2013;52(1):1–8.
- 40 18. Emanuel NM, Saprin AN, Shabalkin VA, Kozlova LE, Krugljakova KE. Detection and Investigation of
- 41 a New Type of ESR Signal characteristic of Some Tumour Tissues. *Nature*. 1969;222(5189):165–167.
- 42 19. Svistunenko DA, Patel RP, Voloshchenko SV, Wilson MT. The Globin-based Free Radical of Ferryl
- 43 Hemoglobin Is Detected in Normal Human Blood. *Journal of Biological Chemistry*. 1997;272(11):7114–
- 44 7121.
- 45 20. Takeshita K, Ozawa T. Recent progress in in vivo ESR spectroscopy. *J. Radiat. Res*. 2004;45(3):373–
- 46 384.

- 1 21. Buckman JF, Hernández H, Kress GJ, et al. MitoTracker labeling in primary neuronal and astrocytic  
2 cultures: influence of mitochondrial membrane potential and oxidants. *J. Neurosci. Methods*.  
3 2001;104(2):165–176.
- 4 22. Spasojević I, Bajić A, Jovanović K, Spasić M, Andjus P. Protective role of fructose in the metabolism  
5 of astroglial C6 cells exposed to hydrogen peroxide. *Carbohydrate Research*. 2009;344(13):1676–1681.
- 6 23. Rifkind JM, Abugo O, Levy A, Heim J. [28] Detection, formation, and relevance of hemichromes  
7 and hemochromes. *Methods in Enzymology*. 1994;231:449–480.
- 8 24. Aebersold R, Mann M. Mass spectrometry-based proteomics. *Nature*. 2003;422(6928):198–207.
- 9 25. Peng WK, Kong TF, Ng CS, et al. Micromagnetic resonance relaxometry for rapid label-free malaria  
10 diagnosis. *Nature Medicine*. 2014;20(9):1069–1073.
- 11 26. Peng WK, Chen L, Han J. Development of miniaturized, portable magnetic resonance relaxometry  
12 system for point-of-care medical diagnosis. *Review of Scientific Instruments*. 2012;
- 13 27. Castro CM, Ghazani AA, Chung J, et al. Miniaturized nuclear magnetic resonance platform for  
14 detection and profiling of circulating tumor cells. *Lab Chip*. 2014;14(1):14–23.
- 15 28. Lee H, Sun E, Ham D, Weissleder R. Chip–NMR biosensor for detection and molecular analysis of  
16 cells. *Nature Medicine*. 2008;14(8):869–874.
- 17 29. Haun JB, Devaraj NK, Hilderbrand SA, Lee H, Weissleder R. Bioorthogonal chemistry amplifies  
18 nanoparticle binding and enhances the sensitivity of cell detection. *Nature Nanotechnology*.  
19 2010;5(9):660–665.
- 20 30. Issadore D, Min C, Liong M, et al. Miniature magnetic resonance system for point-of-care  
21 diagnostics. *Lab on a Chip*. 2011;11(13):2282.
- 22 31. Liong M, Hoang AN, Chung J, et al. Magnetic barcode assay for genetic detection of pathogens.  
23 *Nature Communications*. 2013;4(1):.
- 24 32. Kong TF, Peng WK, Luong TD, Nguyen N-T, Han J. Adhesive-based liquid metal radio-frequency  
25 microcoil for magnetic resonance relaxometry measurement. *Lab Chip*. 2012;12(2):287–294.
- 26 33. Fook Kong T, Ye W, Peng WK, et al. Enhancing malaria diagnosis through microfluidic cell  
27 enrichment and magnetic resonance relaxometry detection. *Scientific Reports*. 2015;5(1).
- 28 34. Kumar S, Bandyopadhyay U. Free heme toxicity and its detoxification systems in human.  
29 *Toxicology Letters*. 2005;157(3):175–188.
- 30 35. Çimen MYB. Free radical metabolism in human erythrocytes. *Clinica Chimica Acta*. 2008;390(1–  
31 2):1–11.
- 32 36. Hahn EL. Spin Echoes. *Physical Review*. 1950;80(4):580–594.
- 33 37. Fenimore PW, Frauenfelder H, McMahon BH, Young RD. Bulk-solvent and hydration-shell  
34 fluctuations, similar to - and -fluctuations in glasses, control protein motions and functions.  
35 *Proceedings of the National Academy of Sciences*. 2004;101(40):14408–14413.
- 36 38. Robinson MD, Mishra I, Deodhar S, et al. Water T2 as an early, global and practical biomarker for  
37 metabolic syndrome: an observational cross-sectional study. *Journal of Translational Medicine*.  
38 2017;15(1).
- 39 39. Thulborn KR, Waterton JC, Matthews PM, Radda GK. Oxygenation dependence of the transverse  
40 relaxation time of water protons in whole blood at high field. *Biochim. Biophys. Acta*. 1982;714(2):265–  
41 270.
- 42 40. Gomori JM, Grossman RI, Yu-Ip C, Asakura T. NMR relaxation times of blood: dependence on field  
43 strength, oxidation state, and cell integrity. *J Comput Assist Tomogr*. 1987;11(4):684–690.
- 44 41. Ogawa S, Lee TM, Kay AR, Tank DW. Brain magnetic resonance imaging with contrast dependent  
45 on blood oxygenation. *Proceedings of the National Academy of Sciences*. 1990;87(24):9868–9872.
- 46 42. Tarburton J. Amyl Nitrite Induced Hemoglobin Oxidation Studies in Diabetics and Nondiabetics  
47 Blood. *Journal of Diabetes & Metabolism*. 2013;04(04).

- 1 43. Yang H, Jin X, Kei Lam CW, Yan S-K. Oxidative stress and diabetes mellitus. *Clinical Chemistry and*  
2 *Laboratory Medicine*. 2011;49(11).
- 3 44. Bourdon E, Loreau N, Blache D. Glucose and free radicals impair the antioxidant properties of  
4 serum albumin. *FASEB J*. 1999;13(2):233–244.
- 5 45. Roche M, Rondeau P, Singh NR, Tarnus E, Bourdon E. The antioxidant properties of serum  
6 albumin. *FEBS Letters*. 2008;582(13):1783–1787.
- 7 46. Lodovici M, Giovannelli L, Pitozzi V, et al. Oxidative DNA damage and plasma antioxidant capacity  
8 in type 2 diabetic patients with good and poor glycaemic control. *Mutation Research/Fundamental and*  
9 *Molecular Mechanisms of Mutagenesis*. 2008;638(1–2):98–102.
- 10 47. Grösch L, Noack F. NMR relaxation investigation of water mobility in aqueous bovine serum  
11 albumin solutions. *Biochim. Biophys. Acta*. 1976;453(1):218–232.
- 12 48. Cistola DP, Robinson MD. Compact NMR relaxometry of human blood and blood components.  
13 *TrAC Trends in Analytical Chemistry*. 2016;83:53–64.
- 14 49. Kadota K, Yui Y, Hattori R, Murohara Y, Kawai C. Decreased sulfhydryl groups of serum albumin in  
15 coronary artery disease. *Jpn. Circ. J*. 1991;55(10):937–941.
- 16 50. Oettl K, Stauber RE. Physiological and pathological changes in the redox state of human serum  
17 albumin critically influence its binding properties. *Br. J. Pharmacol*. 2007;151(5):580–590.
- 18 51. Sogami M, Era S, Nagaoka S, et al. HPLC-studies on nonmercapt-mercapt conversion of human  
19 serum albumin. *Int. J. Pept. Protein Res*. 1985;25(4):398–402.
- 20 52. Sun N, Yoon T-J, Lee H, et al. Palm NMR and 1-Chip NMR. *IEEE Journal of Solid-State Circuits*.  
21 2011;46(1):342–352.
- 22 53. Haun JB, Castro CM, Wang R, et al. Micro-NMR for Rapid Molecular Analysis of Human Tumor  
23 Samples. *Science Translational Medicine*. 2011;3(71):71ra16–71ra16.
- 24 54. Genuth S, Sun W, Cleary P, et al. Glycation and carboxymethyllysine levels in skin collagen predict  
25 the risk of future 10-year progression of diabetic retinopathy and nephropathy in the diabetes control  
26 and complications trial and epidemiology of diabetes interventions and complications participants with  
27 type 1 diabetes. *Diabetes*. 2005;54(11):3103–3111.
- 28 55. Lee R, Margaritis M, Channon KM, Antoniades C. Evaluating oxidative stress in human  
29 cardiovascular disease: methodological aspects and considerations. *Curr. Med. Chem*.  
30 2012;19(16):2504–2520.
- 31

## 1 **FIGURE LEGENDS**

2 **Figure 1:** Functional sub-Phenotyping of Oxidative Stress with micro MR analysis approach.

3 (a) Schematic illustration of the micro MR assays performed in this work. Once the patient's  
4 blood is collected via venipuncture, necessary biochemical assay is performed in blood  
5 aliquots. Chemical reagent (*e.g.*, nitrite, peroxide) is mixed with the fresh blood and  
6 incubated for an interval of 10 min (unless mentioned otherwise) in selected concentration.  
7 Micro capillary tubes were then used to sample the biological samples *i.e.*, RBCs/plasma.  
8 Standard centrifugal force (3000 *g*, 1 minute) was used to separate and concentrate the  
9 packed RBCs from the buffer to avoid possible hematocrit variation in patients. The capillary  
10 tubes were then slotted into the rf-probe for micro MR analysis and the read-out completes  
11 in less than 5 minutes. Proton NMR of predominantly the bulk water of red blood cells (and  
12 plasma) were adjusted to resonance frequency of 21.57 MHz. The portable micro MR system  
13 developed in this work consists of a benchtop console, detection circuit coil mounted on a  
14 micro stage and a palm-sized 0.5 T permanent magnet, and a temperature controller to  
15 stabilize the magnetic field within the chamber and biological sample under measurement.

16 (b) The rf pulse sequences used were standard CPMG pulse sequence and standard inversion  
17 recovery experiment (with CPMG detection) for the  $T_2$  relaxations, and  $T_1$  relaxations  
18 measurements, respectively. In order to obtain high signal-to-noise ratio under relatively  
19 inhomogeneous magnetic environment, an array of echoes (a few thousands) within a very  
20 short echo interval (in the order of  $\mu\text{s}$ ) were used to acquire spin-echoes from less than 4  $\mu\text{L}$   
21 sample volume of packed RBCs or plasma.

22 (c) Redox reaction of the iron-heme in various oxidation states:  $\text{Fe}^{2+}$ ,  $\text{Fe}^{3+}$ ,  $\text{Fe}^{4+}$  and globin-  
23 radical  $\text{Fe}^{4+}$ , which were chemically-induced in *in-vitro* environment (Methods Online). The  
24 haemoglobins were in two-possible magnetic states: diamagnetic (red) and paramagnetic  
25 state (blue).

26 (d) Various redox states of hemoglobin mapped out using the proposed  $T_1$ — $T_2$  magnetic  
27 state diagram. The coordinates (in ms) were oxy-Hb ( $T_2=152\pm 10$ ,  $T_1=628\pm 25$ ), deoxy-Hb  
28 ( $T_2=124\pm 12$ ,  $T_1=622\pm 15$ ), met-Hb ( $T_2=102\pm 2$ ,  $T_1=198\pm 5$ ), ferryl-Hb ( $T_2=139\pm 10$ ,  
29  $T_1=522\pm 20$ ), oxoferryl-Hb ( $T_2=34.2\pm 4$ ,  $T_1=95.2\pm 6$ ), nitrosyl-Hb ( $T_2=121\pm 4$ ,  $T_1=204\pm 8$ ), and

1 hemichrome ( $T_2=108\pm 4$ ,  $T_1=603\pm 11$ ). (e) The corresponding magnetic states, number of  
2 (un)paired electron, A—ratio, and oxidation state of iron-heme. Three different samplings  
3 were taken from the same donor, and the results were reported as mean  $\pm$  standard error  
4 measurement.

5 (f) A quadrant chart of diabetic subject stratified into subgroups based on their oxidative  
6 status in association with their average glycaemic levels (*e.g.*, HbA<sub>1c</sub>).

7

8 **Figure 2:** Nitrite induced ferrous oxidation: Redox-titration profile of red blood cells as  
9 function of nitrite concentration in (a)  $T_1$  relaxation and (b)  $T_2$  relaxation domain. The  
10 incubation times were 10 minutes. The control baseline readings were ( $T_{20}=149.5$ ,  
11  $T_{10}=621.3$ ) ms, which is the readings for oxy-Hb without any nitrite exposure. The  
12 corresponding concentration dependent (c) A—ratio, and (d)  $T_1$ — $T_2$  trajectories of the  
13 gradual inversion of  $Fe^{2+}$  subpopulation to complete formation of  $Fe^{3+}$  population. Time  
14 dependent kinetic profile of ferrous oxidation using nitrite concentrations (500  $\mu$ M, 4 mM, 8  
15 mM and 10 mM) in (e)  $T_1$  relaxation and (f)  $T_2$  relaxation domain. The corresponding (c) A—  
16 ratio, and (d)  $T_1$ — $T_2$  trajectories in the magnetic state diagram. Three different samplings  
17 were taken from the same donor, and the results were reported as mean  $\pm$  standard error  
18 measurement.

19

20 **Figure 3:** Functional Phenotyping of Nitrosative Stress in RBCs for Subjects with Diabetes  
21 Mellitus. (a) *In vivo* redox formation of high-spin met-Hb, low-spin hemichrome and heme  
22 metabolism. The equivalent chemically induced *in-vitro* environment using sodium  
23 salicylate (SLS). (b) The  $T_1$ — $T_2$  relaxometry coordinates of RBCs baseline readings of non-  
24 DM subjects (blue, n=23) and subjects with poor glycaemic control (red, n=68). (c)  $T_2$   
25 relaxation and (d)  $T_1$  relaxation domain and the corresponding (e) A-ratio index of subjects  
26 with poor glycaemic controls (n=62) and good glycaemic control (n=50) subgroup as  
27 compared to healthy non DM subjects (n=20). The subjects with poor glycaemic controls  
28 were further sub-divided into  $>8\%$  HbA<sub>1c</sub> (n=47) and  $>10\%$  HbA<sub>1c</sub> (n=15) subgroups. The

1 statistical significance was calculated using the Student's T-Test (two-tailed, unequal  
2 variance).

3

4 **Figure 4:** *Ex vivo* Nitrosative Functional Stress Test on Glycated-Hb. The T<sub>1</sub>—T<sub>2</sub> relaxometry  
5 coordinates of RBCs taken before (black) and after (red) nitrite treatment for subjects with  
6 (a) poor glycaemic control (n=39), and (b) good glycaemic control (n=28). (c) Its'  
7 corresponding distribution based on A—ratio index. The statistical significance was  
8 calculated using the Student's T-Test (two-tailed, unequal variance). (d) The diagnostic  
9 accuracy as calculated using ROC curve for RBCs taken before (black) and after (red) the  
10 stress test. The probability diagnostic accuracy is quantified as Area Under the Curve (AUC).  
11 (e) A quadrant chart of diabetic subjects stratified into subgroups based on their oxidative  
12 status (nitrosative stress) in association with their glycemic levels (*e.g.*, HbA<sub>1c</sub>) as compared  
13 with healthy non DM subjects (n=23). The proposed method segregated effectively the  
14 subgroup III subjects (good glycemic control and yet high nitrosative stress) from the rest of  
15 the cohorts. Note that the Y-axis (nitrosative stress) were inversely represented as compared  
16 to quadrants shown in Figure 1F.

17

18 **Figure 5:** Functional Phenotyping of Oxidative Stress in Plasma for Subjects with Diabetes  
19 Mellitus. (a) The T<sub>1</sub>—T<sub>2</sub> relaxometry coordinates of plasma baseline taken from healthy non  
20 DM subjects (blue, n=24), subjects with good glycaemic control (green, n=55) and subjects  
21 with poor glycaemic control (red, n=39). (b) The corresponding A-ratio against the subjects  
22 with poor glycaemic control (n=39) and good glycaemic control (n=55) subgroups, as  
23 compared to healthy non DM subjects (n=24). The subjects with poor glycaemic controls  
24 were further subdivided into >8% HbA<sub>1c</sub> (n=14) and >10% HbA<sub>1c</sub> (n=25) subgroups. The  
25 statistical significance was calculated using the Student's T-Test (two-tailed, unequal  
26 variance). (c) The diagnostic accuracy of RBCs (gray) and plasma (red) taken from subjects  
27 with good glycaemic control with respect to healthy non DM subjects. The number of  
28 subjects (n) were indicated on the parentheses (non-DM, good glycaemic control).

29

1 **Figure 6:** *Ex vivo* Peroxidative Functional Stress Test on Plasma. The  $T_1$ — $T_2$  relaxometry  
2 coordinates of plasma baseline (black square) and plasma pretreated with hydrogen  
3 peroxide (red dot) for subjects with (a) poor glycaemic control (n=52), (b) good glycaemic  
4 control (n=18), and (c) healthy non DM (n=21). (d) The corresponding  $A_{\text{peroxidative}}$  index taken  
5 before (black) and after (blue, green, red) the peroxidative stress test. (e) A quadrant chart  
6 of diabetic subjects stratified into subgroups based on their peroxidative status (normalized  
7  $A_{\text{baseline}} - A_{\text{stress}}$ ) in association with their glycaemic levels (*e.g.*,  $HbA_{1c}$ ) as compared with  
8 healthy non DM subjects. Note that the Y-axis (peroxidative stress) were inversely  
9 represented as compared to Y-axis (nitrosative stress) in quadrant shown in Figure 4E.

10



Running head: sub-Phenotyping of Oxidative Stress in Diabetes

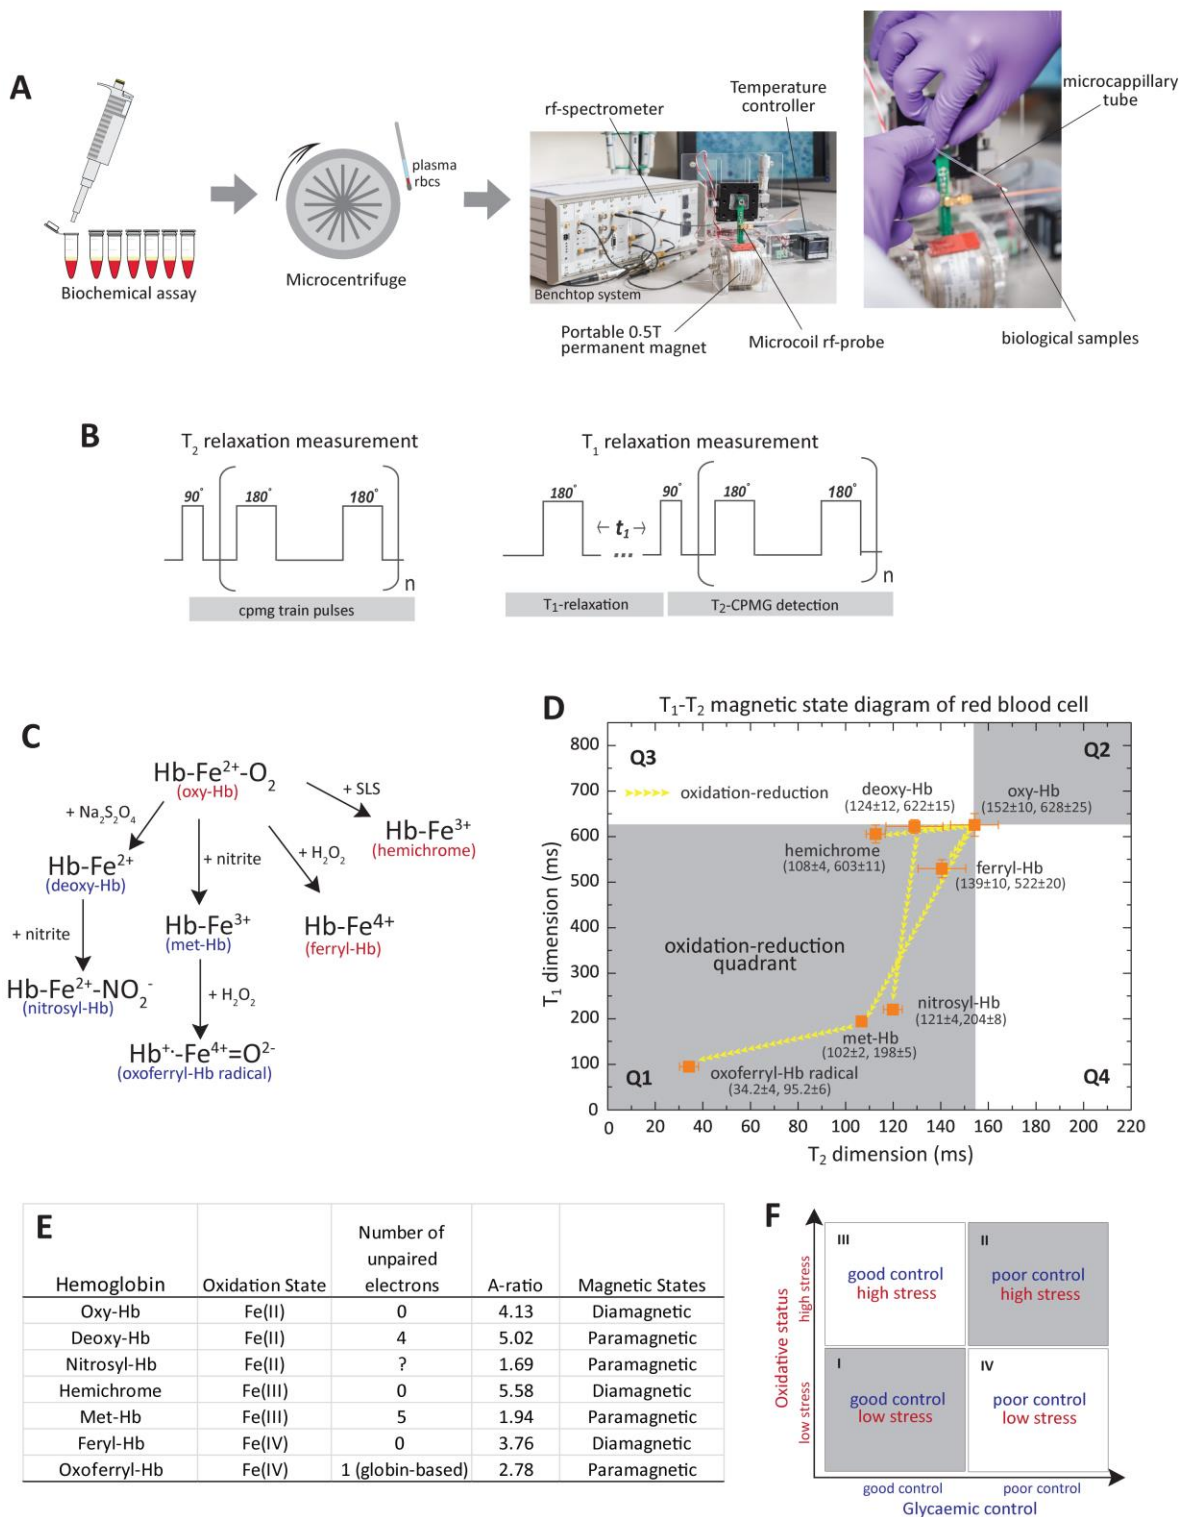

Fig. 1  
W.K. Peng et. al.,

1

2

1

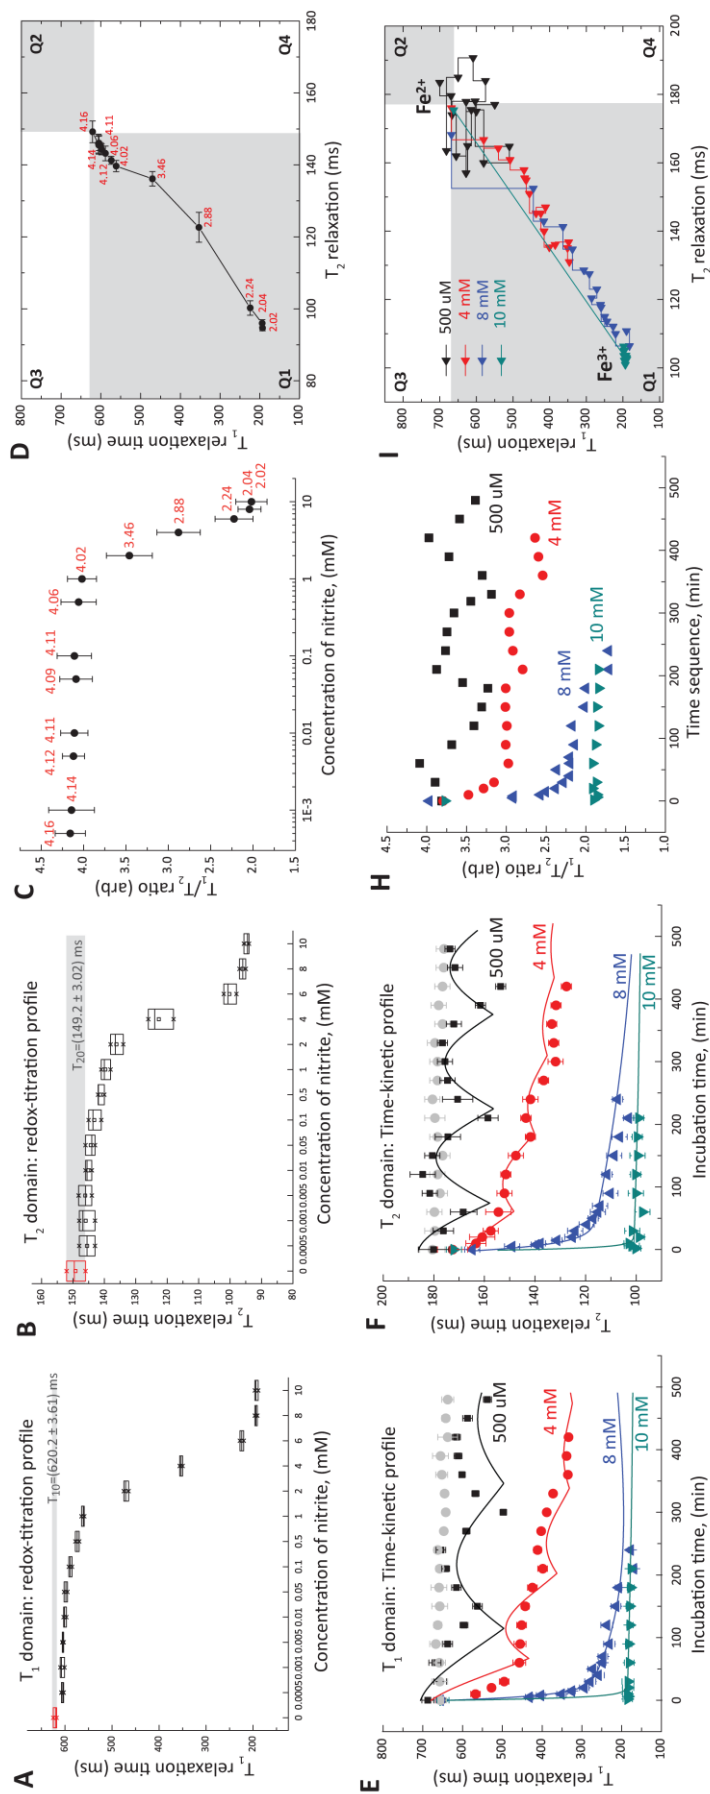

Fig. 2  
W.K. Peng et. al.,

1

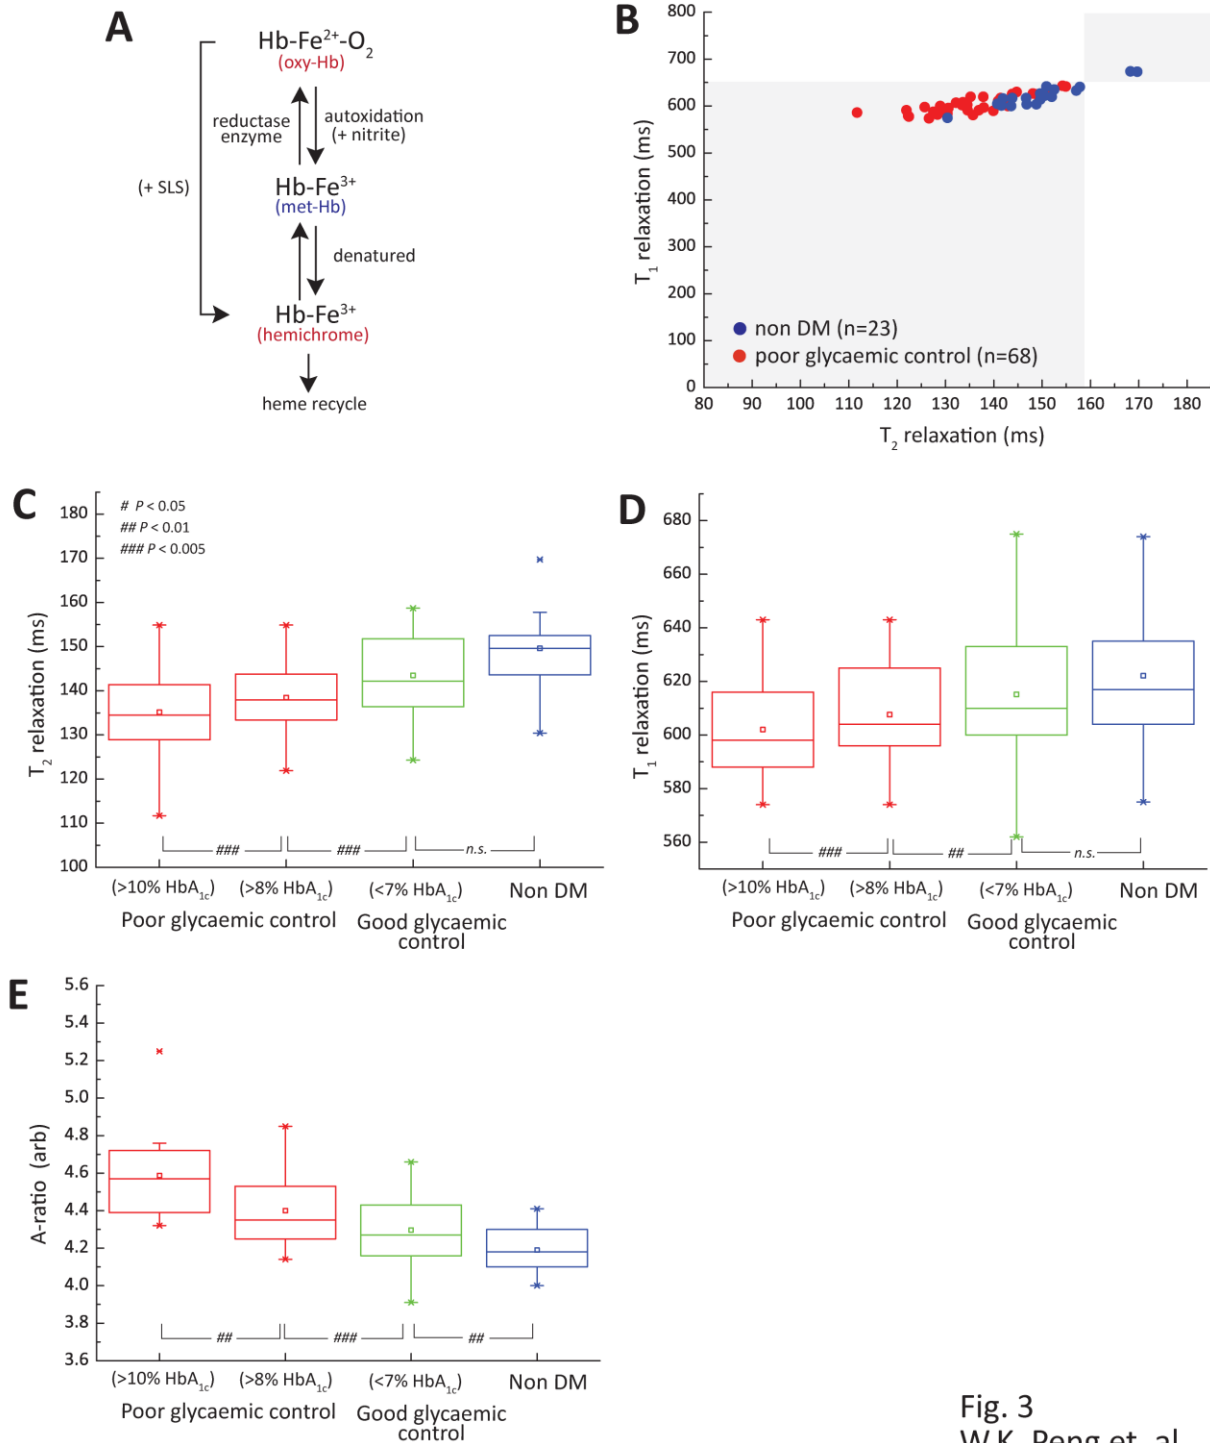

Fig. 3  
W.K. Peng et. al.,

2

3

4

Running head: sub-Phenotyping of Oxidative Stress in Diabetes

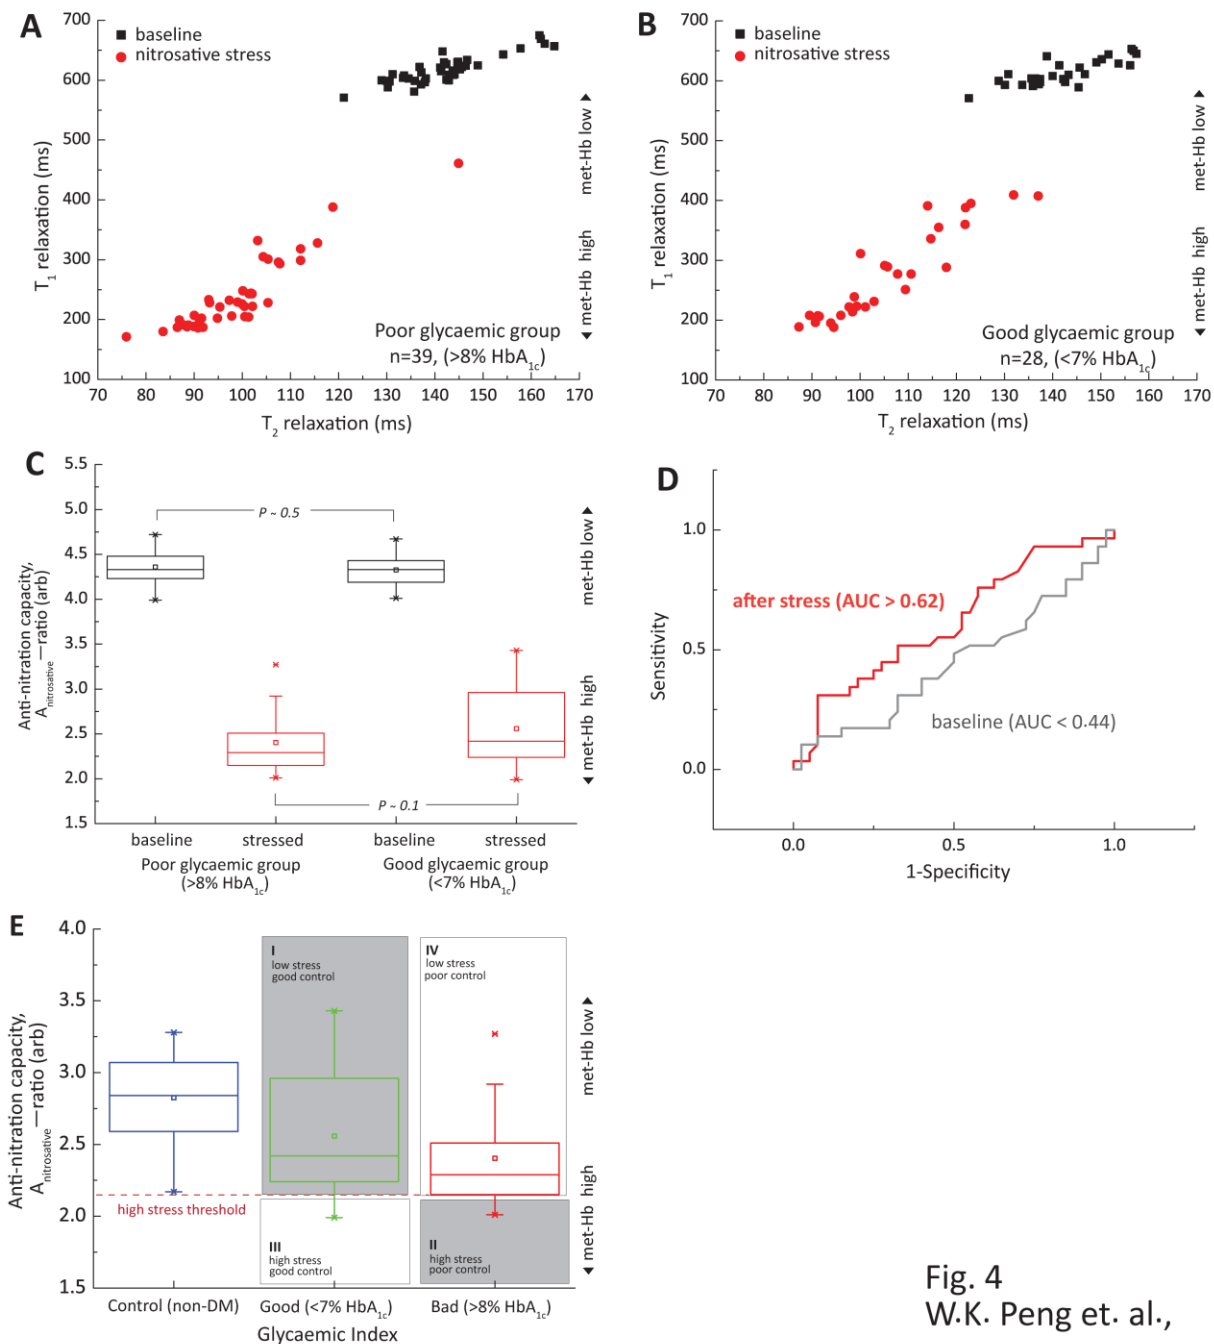

Fig. 4  
W.K. Peng et. al.,

1  
2  
3  
4  
5

Running head: sub-Phenotyping of Oxidative Stress in Diabetes

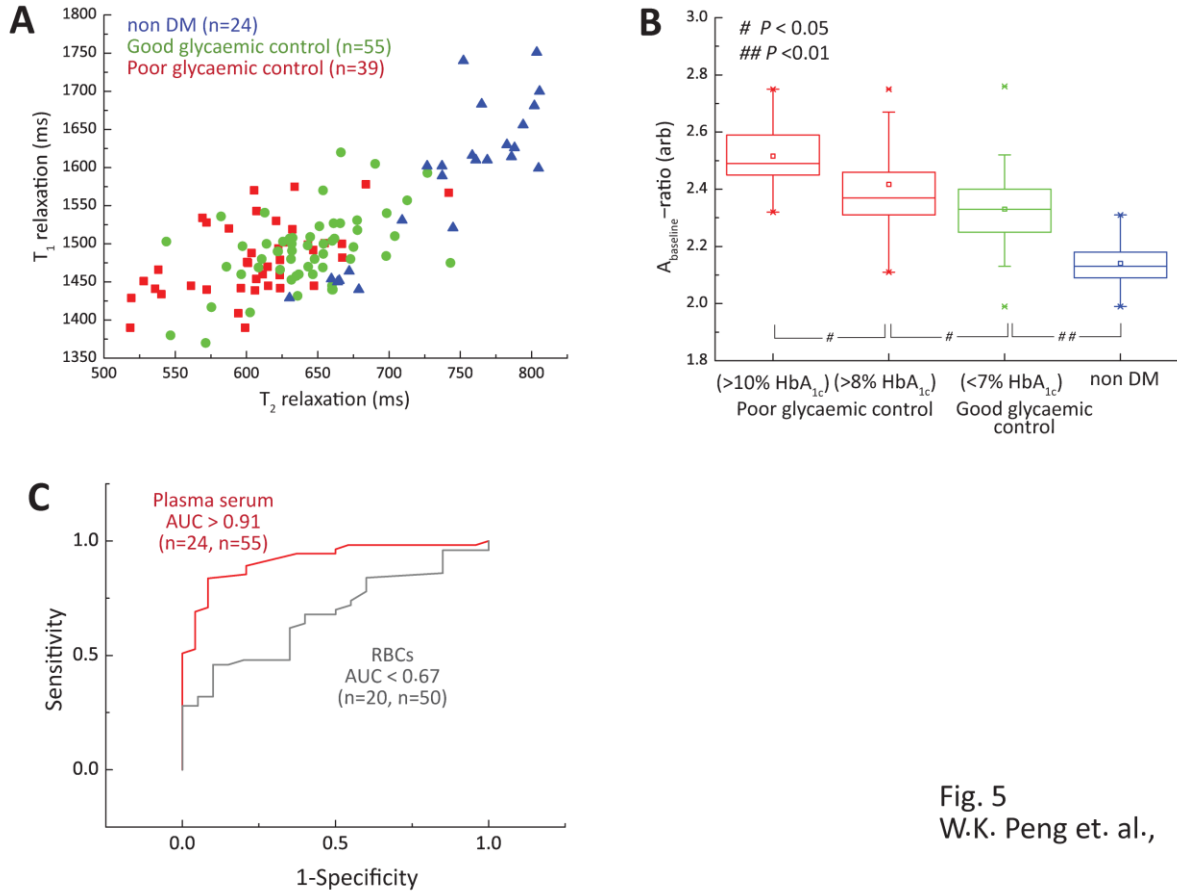

Fig. 5  
W.K. Peng et. al.,

1

2

Running head: sub-Phenotyping of Oxidative Stress in Diabetes

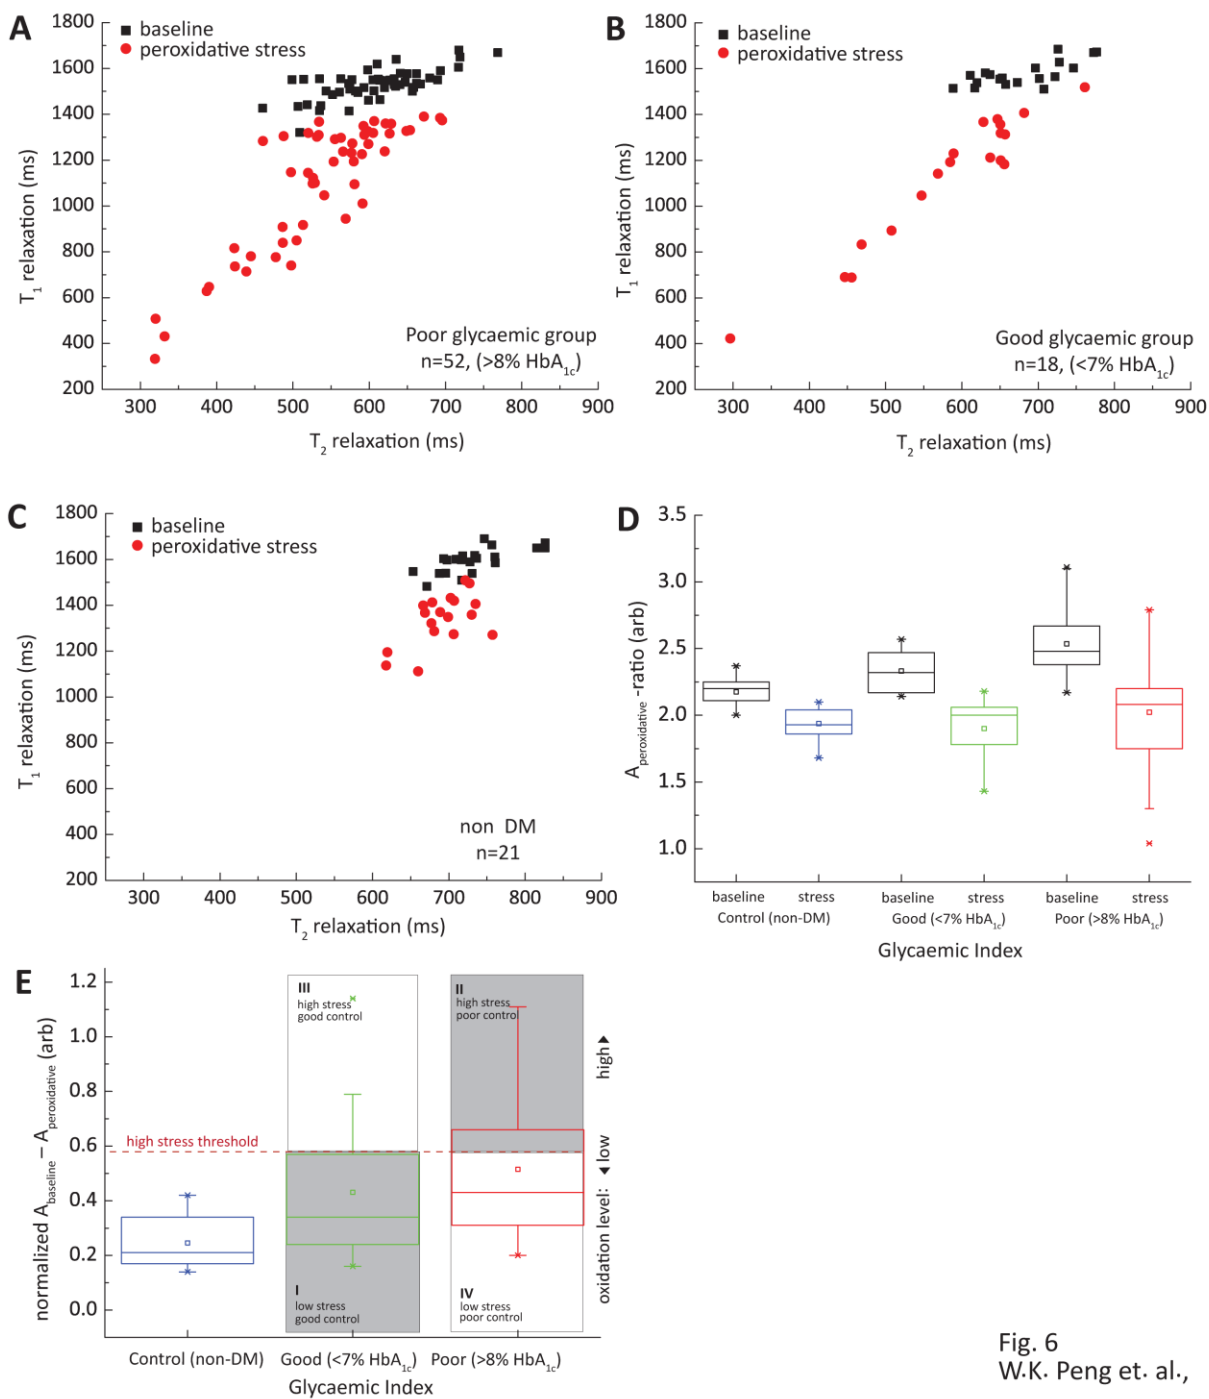

Fig. 6  
W.K. Peng et. al.,

1  
2  
3
